# Supplementary material
Source: publisher site journal article supplement (https://www.spandidos-publications.com/2649/downloadSupplementary)
Supplement: Supplementary file 1 [file downloadSupplementary]

Table SI. Patient information in each group.

| Groups for sample collection                | Number of individuals | Age     |         | Sex  |        | Total PMBC samples | Total plasma samples |
|---------------------------------------------|-----------------------|---------|---------|------|--------|--------------------|----------------------|
|                                             |                       | Minimum | Maximum | Male | Female |                    |                      |
| Healthy children for plasma                 | 22                    | 1 Y     | 12 Y    | 12   | 10     | -                  | 22                   |
| Patients with leukemia for plasma           | 43                    | 10 M    | 13 Y    | 24   | 19     |                    |                      |
| Patients with leukemia for plasma and PBMCs | 12                    | 1 Y     | 13 Y    | 8    | 4      | 18                 | 55                   |
| Patients with leukemia for PBMCs            | 6                     | 2 Y     | 8 Y     | 2    | 4      |                    |                      |
| Healthy children for PBMCs                  | 6                     | 1 Y     | 7 Y     | 3    | 3      | 6                  | -                    |

Y, year; M, month; PMBC, peripheral blood mononuclear cell.

Table SII. Clinical information of patients with pediatric leukemia.

| Patient number | Sex    | Age  | Flow cytometry analysis                         | White blood cell number/immature cell proportion in peripheral blood (%) | Fusion gene or chromosome                                | Leukemia type | Sample collection |
|----------------|--------|------|-------------------------------------------------|--------------------------------------------------------------------------|----------------------------------------------------------|---------------|-------------------|
| 32             | Male   | 3 Y  | B-cell acute lymphoblastic leukemia             | 32.39x10 <sup>9</sup> /35                                                | No fusion gene                                           | B-ALL         | PBMCs             |
| 35             | Female | 7 Y  | B-cell acute lymphoblastic leukemia             | 22.32x10 <sup>9</sup> /61                                                | No fusion gene                                           | B-ALL         | PBMCs             |
| 37             | Female | 8 Y  | Acute myeloid leukemia                          | 2.33x10 <sup>9</sup> /No data                                            | No fusion gene                                           | AML           | PBMCs             |
| 38             | Male   | 2 Y  | B-cell acute lymphoblastic leukemia             | 22.16x10 <sup>9</sup> /No data                                           | BCR/ABL1 fusion gene                                     | B-ALL         | PBMCs             |
| 39             | Female | 7 Y  | Abnormal immature B lymphocytes                 | 4.85x10 <sup>9</sup> /18                                                 | No fusion gene                                           | B-ALL         | PBMCs             |
| 41             | Female | 5 Y  | T-cell acute lymphoblastic leukemia             | 165.95x10 <sup>9</sup> /28                                               | No fusion gene                                           | T-ALL         | PBMCs             |
| 2              | Female | 13 Y | 91.4% immature B lymphocytes                    | 39.18x10 <sup>9</sup> /56                                                | No fusion gene                                           | B-ALL         | PBMCs and plasma  |
| 3              | Male   | 5 Y  | B-cell acute lymphoblastic leukemia             | 43.62x10 <sup>9</sup> /73                                                | BCR/ABL1(p190) fusion gene                               | B-ALL         | PBMCs and plasma  |
| 9              | Male   | 2 Y  | B-cell acute lymphoblastic leukemia (Pro-B-ALL) | 47.16x10 <sup>9</sup> /66                                                | No fusion gene                                           | B-ALL         | PBMCs and plasma  |
| 11             | Female | 6 Y  | B-cell acute lymphoblastic leukemia             | 11.28x10 <sup>9</sup> /18                                                | BCR/ABL fusion gene                                      | B-ALL         | PBMCs and plasma  |
| 12             | Female | 1 Y  | Immature B lymphocytes                          | 2.23x10 <sup>9</sup> /2                                                  | ETV/RUNX1 fusion gene                                    | B-ALL         | PBMCs and plasma  |
| 15             | Male   | 3 Y  | Acute myeloid leukemia                          | 217.62x10 <sup>9</sup> /23                                               | No fusion gene                                           | AML           | PBMCs and plasma  |
| 18             | Male   | 13 Y | Acute monocyte leukemia (M5b)                   | 24.73x10 <sup>9</sup> /20                                                | MLL-AF9 gene                                             | AML           | PBMCs and plasma  |
| 20             | Male   | 8 Y  | Immature B lymphocytes                          | 391.93x10 <sup>9</sup> /3                                                | 46,XY[5]                                                 | B-ALL         | PBMCs and plasma  |
| 21             | Female | 8 Y  | T-cell acute lymphoblastic leukemia             | 478.00x10 <sup>9</sup> /28                                               | AMLL/ETO fusion gene                                     | T-ALL         | PBMCs and plasma  |
| 22             | Male   | 3 Y  | Acute myeloid leukemia (Non-M3)                 | 4.78x10 <sup>9</sup> /12                                                 | No fusion gene; 46,XY(15)                                | AML           | PBMCs and plasma  |
| 27             | Male   | 2 Y  | Acute myeloid leukemia (Non-M3)                 | 118.42x10 <sup>9</sup> /84                                               | No fusion gene                                           | AML           | PBMCs and plasma  |
| 31             | Male   | 2 Y  | Acute myeloid leukemia (Non-M3)                 | 179.41x10 <sup>9</sup> /90                                               | MLL/ENL fusion gene                                      | AML           | PBMCs and plasma  |
| 1              | Female | 5 Y  | Acute myeloid leukemia (Non-M3)                 | 47.81x10 <sup>9</sup> /54                                                | No fusion gene                                           | AML           | PBMCs and plasma  |
| 4              | Female | 13 Y | Acute myeloid leukemia (Non-M3)                 | 2.64x10 <sup>9</sup> /No data                                            | No fusion gene                                           | AML           | Plasma            |
| 13             | Male   | 4 Y  | Acute myeloid leukemia (Non-M3)                 | 12.16x10 <sup>9</sup> /14                                                | MLL-AF9 fusion gene                                      | AML           | Plasma            |
| 19             | Male   | 11 Y | Acute myeloid leukemia (M2)                     | 6.78x10 <sup>9</sup> /No data                                            | AMLL/ETO fusion gene                                     | AML           | Plasma            |
| 26             | Female | 10 Y | Myeloid primitive cells                         | 26.18x10 <sup>9</sup> /5                                                 | CBFβ-MYH11 fusion gene                                   | AML           | Plasma            |
| 42             | Male   | 11 Y | Myeloid primitive cells                         | 62.10x10 <sup>9</sup> /43                                                | AML1-ETO fusion gene                                     | AML           | Plasma            |
| 43             | Male   | 7 Y  | Acute myeloid leukemia                          | 61.40x10 <sup>9</sup> /72                                                | WT1 fusion gene                                          | AML           | Plasma            |
| 44             | Female | 3 Y  | Myeloid primitive cells                         | 14.75x10 <sup>9</sup> /45                                                | MLL-AF9 fusion gene                                      | AML           | Plasma            |
| 45             | Male   | 4 Y  | Acute myeloid leukemia (Non-M3)                 | 82.50x10 <sup>9</sup> /51                                                | AML1-ETO fusion gene                                     | AML           | Plasma            |
| 46             | Female | 9 Y  | Acute myeloid leukemia                          | 21.74x10 <sup>9</sup> /6                                                 | CBF/MYH11 fusion gene                                    | AML           | Plasma            |
| 47             | Female | 9 Y  | Myeloid primitive cells                         | 39.56x10 <sup>9</sup> /59                                                | CATA2 fusion gene                                        | AML           | Plasma            |
| 24             | Male   | 1 Y  | Acute myeloid leukemia (Non-M3)                 | 6.23x10 <sup>9</sup> /18                                                 | No fusion gene                                           | AML           | Plasma            |
| 5              | Male   | 5 Y  | ~81.2% of T-ALL tumor cells                     | 279.39x10 <sup>9</sup> /82                                               | No fusion gene                                           | AML           | Plasma            |
| 28             | Male   | 12 Y | Immature monocytes                              | 46.37x10 <sup>9</sup> /48                                                | No fusion gene                                           | T-ALL         | Plasma            |
| 33             | Male   | 1 Y  | Immature monocytes                              | 0.90x10 <sup>9</sup> /No data                                            | No fusion gene                                           | AML           | Plasma            |
|                |        |      |                                                 |                                                                          | ETV6/RUNX1 (TEL/AMLL) fusion gene; 47,XY+21[17]/46,XY[1] |               |                   |

Table SII. Continued.

| Patient number | Sex    | Age  | Flow cytometry analysis                         | White blood cell number/immature cell proportion in peripheral blood (%) | Fusion gene or chromosome                                            | Leukemia type | Sample collection |
|----------------|--------|------|-------------------------------------------------|--------------------------------------------------------------------------|----------------------------------------------------------------------|---------------|-------------------|
| 6              | Male   | 3 Y  | 82.7% immature B lymphocytes                    | 41.81x10 <sup>9</sup> /64                                                | No fusion gene                                                       | B-ALL         | Plasma            |
| 8              | Female | 4 Y  | 21.0% abnormal and immature B lymphocytes       | 1.46x10 <sup>9</sup> /No data                                            | No fusion gene                                                       | B-ALL         | Plasma            |
| 7              | Male   | 4 Y  | Abnormal B lymphocytes                          | 28.10x10 <sup>9</sup> /25                                                | No fusion gene                                                       | B-ALL         | Plasma            |
| 10             | Female | 2 Y  | B-cell acute lymphoblastic leukemia             | 2.74x10 <sup>9</sup> /No data                                            | Chromosome karyotype 46,XY(9)                                        | B-ALL         | Plasma            |
| 14             | Male   | 2 Y  | Abnormal B lymphocytes                          | 38.09x10 <sup>9</sup> /75                                                | No fusion gene                                                       | B-ALL         | Plasma            |
| 16             | Male   | 4 Y  | Immature B lymphocytes                          | 110.92x10 <sup>9</sup> /80                                               | TCF3/PBX1 fusion gene; chromosome karyotype, 46,XY,t(1,19)(q23; p13) | B-ALL         | Plasma            |
| 17             | Male   | 2 Y  | Abnormal B lymphocytes                          | 42.52x10 <sup>9</sup> /60                                                | E2A-PBX1 gene                                                        | B-ALL         | Plasma            |
| 23             | Male   | 7 Y  | Immature B lymphocytes                          | 11.40x10 <sup>9</sup> /36                                                | 45,X,-Y,t(8;21)(q22;q22)                                             | B-ALL         | Plasma            |
| 25             | Male   | 12 Y | B-cell acute lymphoblastic leukemia             | 9.82x10 <sup>9</sup> /No data                                            | No fusion gene                                                       | B-ALL         | Plasma            |
| 29             | Female | 5 Y  | Immature B lymphocytes                          | 4.68x10 <sup>9</sup> /No data                                            | ETV6/RUNX1 fusion gene                                               | B-ALL         | Plasma            |
| 30             | Female | 10 M | Immature B lymphocytes                          | 36.64x10 <sup>9</sup> /66                                                | ETV6/RUNX1 fusion gene                                               | B-ALL         | Plasma            |
| 34             | Female | 6 Y  | B-cell acute lymphoblastic leukemia (Pro-B-ALL) | 69.80x10 <sup>9</sup> /16.7                                              | MLL-AF4 fusion gene                                                  | B-ALL         | Plasma            |
| 36             | Female | 4 Y  | Abnormal immature B lymphocytes                 | 167.59x10 <sup>9</sup> /No data                                          | ETV6/RUNX1 fusion gene                                               | B-ALL         | Plasma            |
| 40             | Female | 3 Y  | B-cell acute lymphoblastic leukemia             | 11.76x10 <sup>9</sup> /38                                                | No fusion gene                                                       | B-ALL         | Plasma            |
| 48             | Male   | 11 Y | B-cell acute lymphoblastic leukemia             | 93.25x10 <sup>9</sup> /41                                                | CRFL2 fusion gene                                                    | B-ALL         | Plasma            |
| 49             | Male   | 11 Y | B-cell acute lymphoblastic leukemia             | 126.70x10 <sup>9</sup> /92                                               | FLT3-TKD fusion gene                                                 | B-ALL         | Plasma            |
| 50             | Male   | 4 Y  | B-cell acute lymphoblastic leukemia             | 5.75x10 <sup>9</sup> /15                                                 | E2A-PBX1 fusion gene                                                 | B-ALL         | Plasma            |
| 51             | Female | 6 Y  | ~54% abnormal and immature B lymphocytes        | 21.73x10 <sup>9</sup> /39                                                | TCF3/PBX1 fusion gene                                                | B-ALL         | Plasma            |
| 52             | Male   | 11 Y | B-cell acute lymphoblastic leukemia             | 15.00x10 <sup>9</sup> /21                                                | ZNKF384/TCF3 fusion gene                                             | B-ALL         | Plasma            |
| 53             | Female | 4 Y  | Immature B lymphocytes                          | 8.54x10 <sup>9</sup> /17                                                 | KMT2A-USP2 fusion gene                                               | B-ALL         | Plasma            |
| 54             | Male   | 3 Y  | ~77.4% abnormal and immature B lymphocytes      | 54.21x10 <sup>9</sup> /62                                                | MLL fusion gene                                                      | B-ALL         | Plasma            |
| 55             | Female | 14 Y | Immature B lymphocytes                          | 6.10x10 <sup>9</sup> /9                                                  | MEF2D/BCL9 fusion gene                                               | B-ALL         | Plasma            |
| 56             | Male   | 2 Y  | B-cell acute lymphoblastic leukemia             | 161.00x10 <sup>9</sup> /87                                               | EP300-ZNF384 fusion gene                                             | B-ALL         | Plasma            |
| 57             | Male   | 5 Y  | B-cell acute lymphoblastic leukemia             | 4.20x10 <sup>9</sup> /5                                                  | No fusion gene                                                       | B-ALL         | Plasma            |
| 58             | Female | 3 Y  | Immature B lymphocytes                          | 75.10x10 <sup>9</sup> /85                                                | 46,XY[2]                                                             | B-ALL         | Plasma            |
| 59             | Male   | 3 Y  | Abnormal immature B lymphocytes                 | 60.20x10 <sup>9</sup> /25                                                | No fusion gene                                                       | B-ALL         | Plasma            |
| 60             | Female | 5 Y  | ~55.1% abnormal and immature B lymphocytes      | 15.31x10 <sup>9</sup> /48                                                | CRKF fusion gene                                                     | B-ALL         | Plasma            |
| 61             | Female | 3 Y  | Immature B lymphocytes                          | 6.32x10 <sup>9</sup> /12                                                 | No fusion gene                                                       | B-ALL         | Plasma            |

Y, year; M, month; B-ALL, B-cell acute lymphoblastic leukemia; T-ALL, T-cell acute lymphoblastic leukemia; AML, acute myeloid leukemia; PBM, peripheral blood mononuclear cell.
